# Supplementary material for: Defect compensation and intervalence charge transfer state-based Pr3+-doped niobate antithermal quenching phosphors
Source: Royal Society of Chemistry journal article supplement (doi:10.1039/d4cc02055c), 2024-01-01
Supplement: d4cc02055c1.pdf [file d4cc02055c1.pdf]

# Supporting Information

## Defect Compensation and Intervalence Charge Transfer State-Based Pr<sup>3+</sup>-Doped Niobate Antithermal Quenching Phosphors

Chunwei Yang,<sup>a</sup> Yanmei Xin,<sup>a</sup> Jianxia Liu,<sup>a</sup> Yuefeng Zhao,<sup>a</sup> Ruizhuo Ouyang<sup>a</sup> and Ning Guo<sup>\*a</sup>

<sup>a</sup> Department of Chemistry, University of Shanghai for Science and Technology, Shanghai 200093, P. R. China.

\*Corresponding author: E-mail: [guoning@usst.edu.cn](mailto:guoning@usst.edu.cn)

## **1.Experimental Section**

### **1.1. Materials and Synthesis.**

A series of  $\text{Sr}_{2-x}\text{Ca}_x\text{Nb}_2\text{O}_7:\text{Pr}^{3+}(0.5\%)$  ( $x = 0, 0.5, 1.0, 1.5, 2.0$ ) phosphors were prepared using a high-temperature solid-state method. All samples were prepared with  $\text{SrCO}_3$  (99.9%),  $\text{CaCO}_3$  (99.9%),  $\text{Nb}_2\text{O}_5$  (99.9%), and  $\text{P}_6\text{O}_{11}$  (99.9%) as raw materials, accurately weighed according to the stoichiometric ratio, and 0.5%  $\text{Li}_2\text{CO}_3$  (99.9%) was added as a co-solvent. During the preparation process, the mixture was thoroughly ground for 30 minutes in an agate mortar, then transferred to a covered crucible, and react in air at  $900^\circ\text{C}$  for 4 h, then grind for 30min, then transfer to air at  $1400^\circ\text{C}$  for 4 h. The final product was cooled to room temperature and ground again for 30 minutes for subsequent analysis.

### **1.2. Characterization Methods.**

The samples were tested by X-ray diffraction (XRD), XRD Rietveld refinements, scanning electron microscopy (SEM), Raman spectra, UV-vis diffuse reflectance spectroscopy, X-ray Photoelectron Spectroscopy (XPS), thermoluminescence (TL) spectrum, photoluminescence excitation (PLE) spectra, photoluminescence (PL) spectra, and temperature-dependent spectra. The TL spectrum was measured by TOSL-3DS instrument, excited at 254 nm for 5 min, and then heated at 1 K/s. For detailed information and parameters of the other tests, please refer to our previous work.<sup>1,2</sup>

# Figure S1

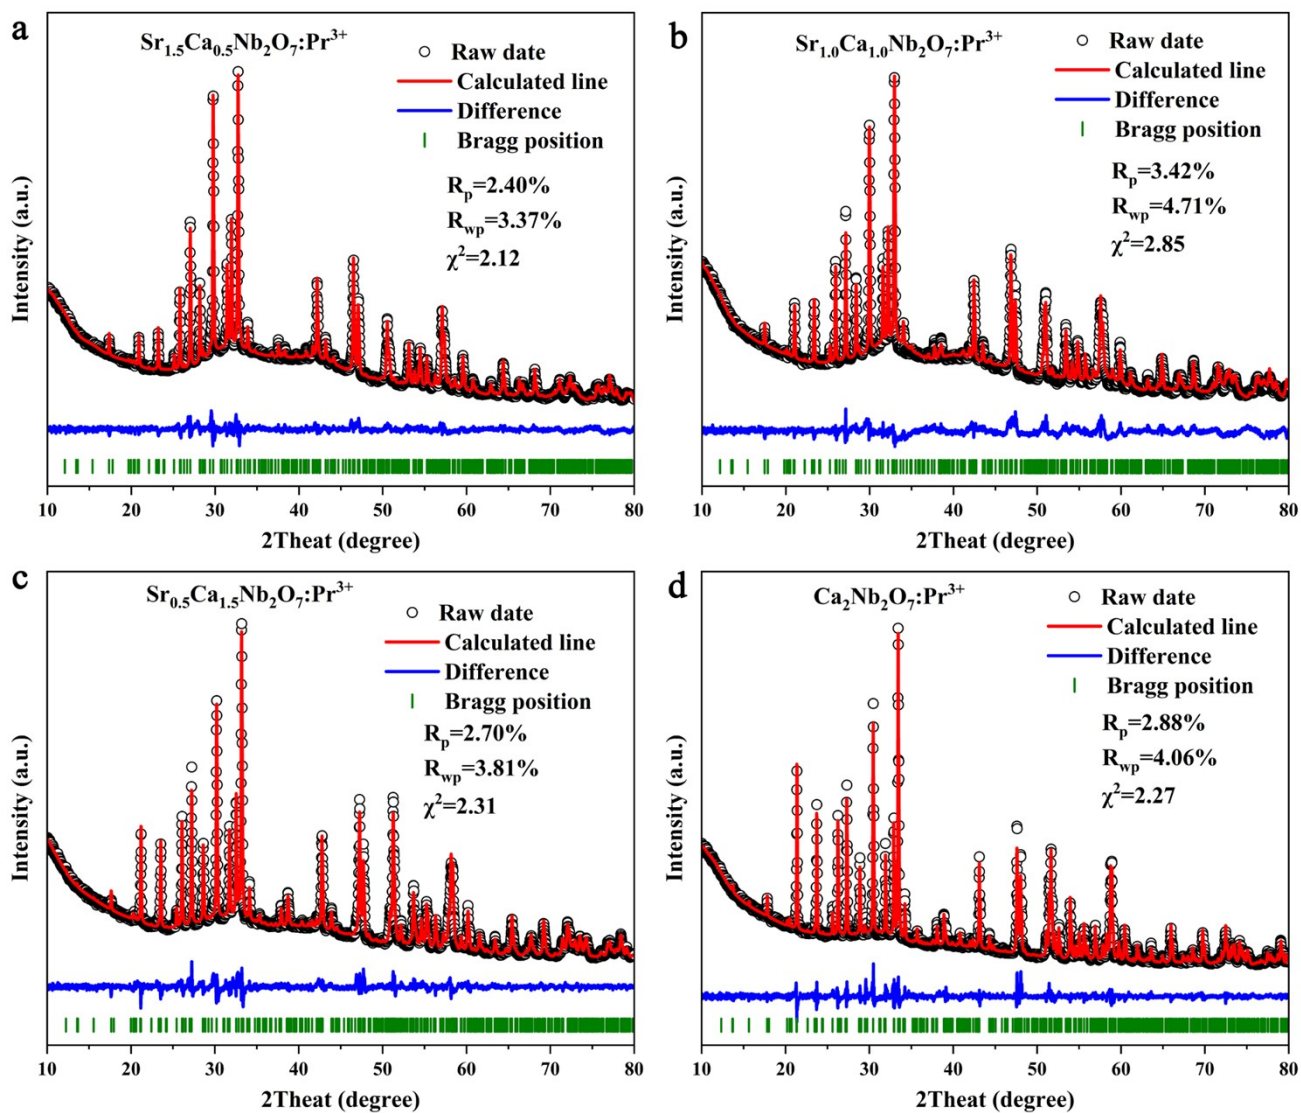

Figure S1. The Rietveld refinement plot of the X-ray diffraction pattern of  $\text{Sr}_{2-x}\text{Ca}_x\text{Nb}_2\text{O}_7:\text{Pr}^{3+}$  ( $x = 0.5, 1.0, 1.5, 2.0$ ).

## Figure S2

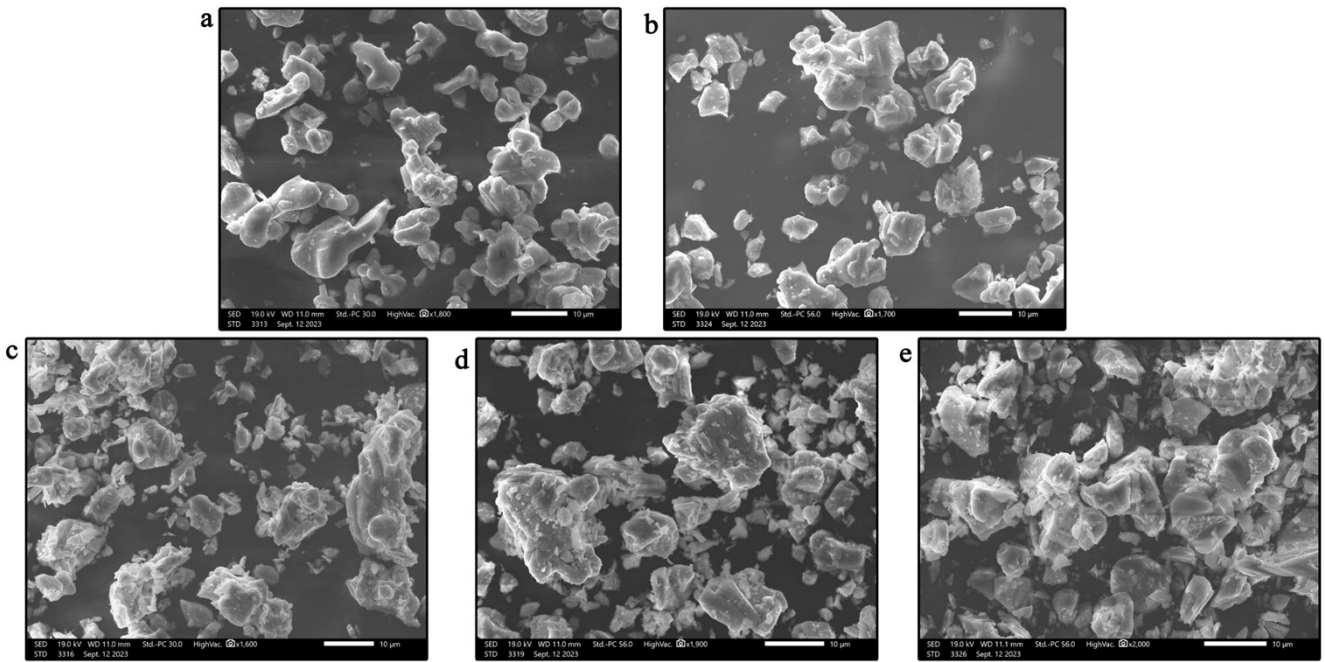

Figure S2. The SEM image of  $\text{Sr}_{2-x}\text{Ca}_x\text{Nb}_2\text{O}_7:\text{Pr}^{3+}$  (a)  $x = 0$ , (b)  $x = 2.0$ , (c)  $x=0.5$ , (d)  $x=1.0$ , (e)  $x=1.5$ .

# Figure S3

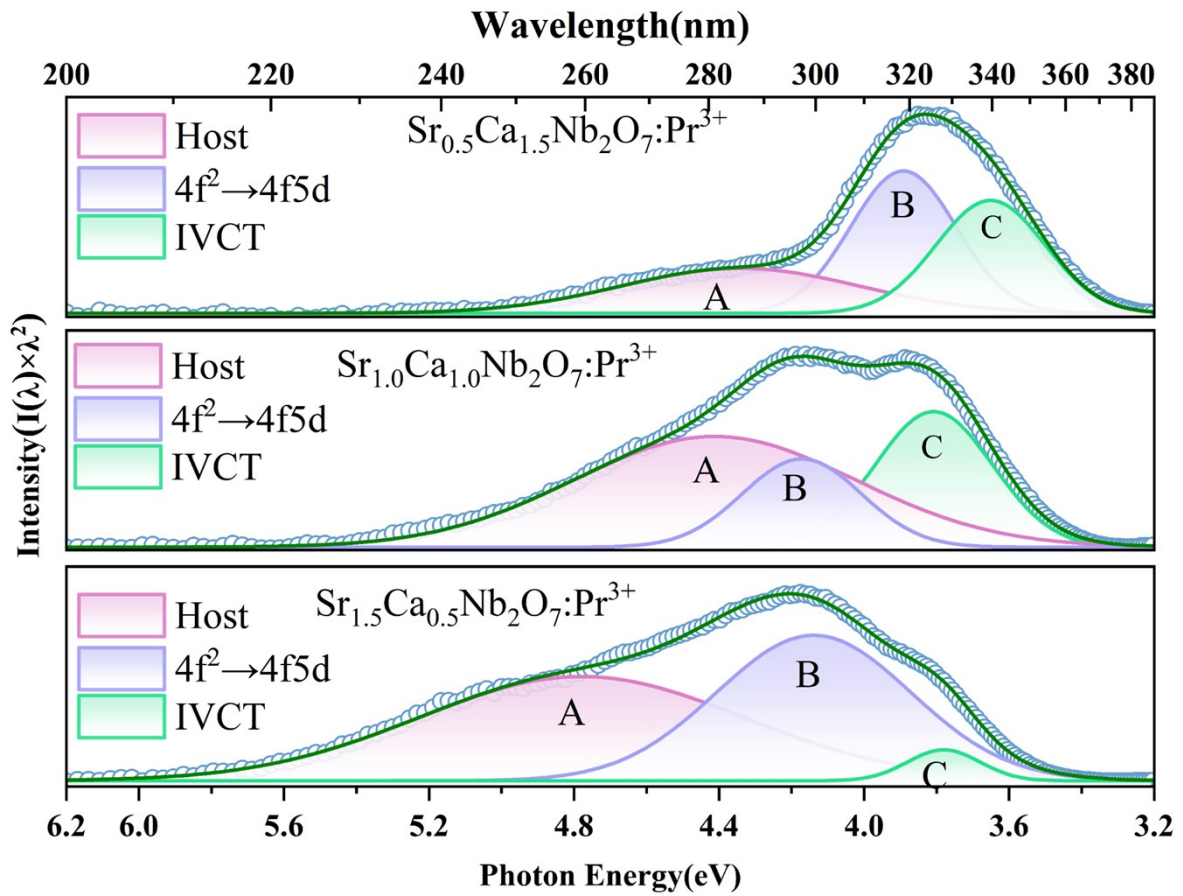

Figure S3. Gaussian fitting to the photoluminescence excitation spectrum of  $\text{Sr}_{1.5}$ ,  $\text{Sr}_{1.0}$ ,  $\text{Sr}_{0.5}$ .

# Figure S4

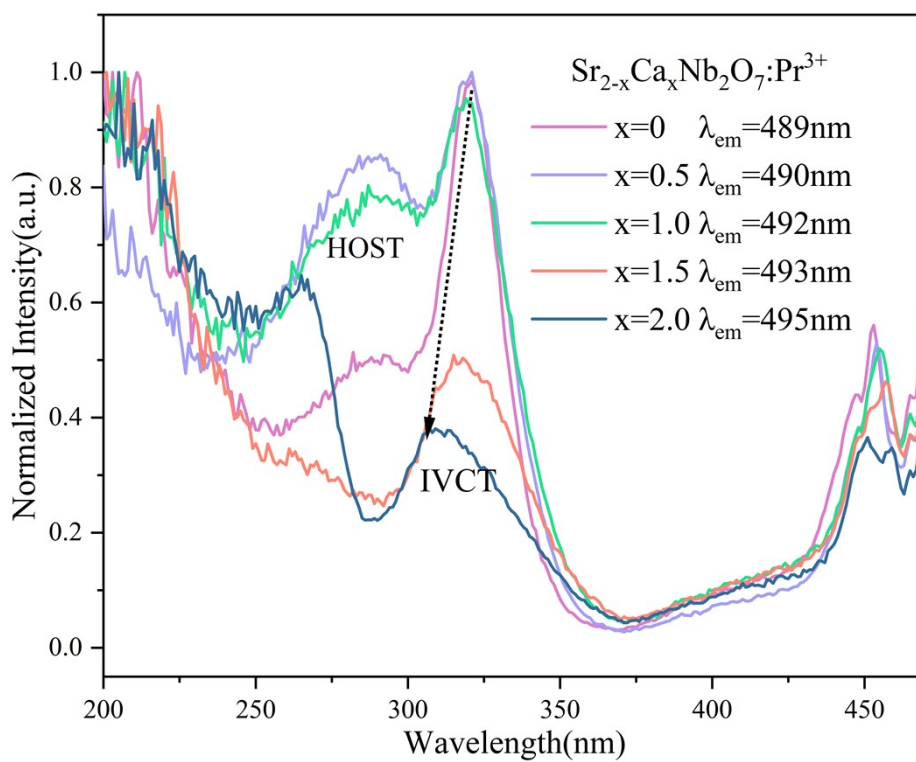

Figure S4. Monitoring the normalized PLE spectra of  $\text{Sr}_{2-x}\text{Ca}_x\text{Nb}_2\text{O}_7:\text{Pr}^{3+}$  ( $x = 0, 0.5, 1.0, 1.5, 2.0$ ) for the  ${}^3P_0 \rightarrow {}^3H_4$  emission.

# Figure S5

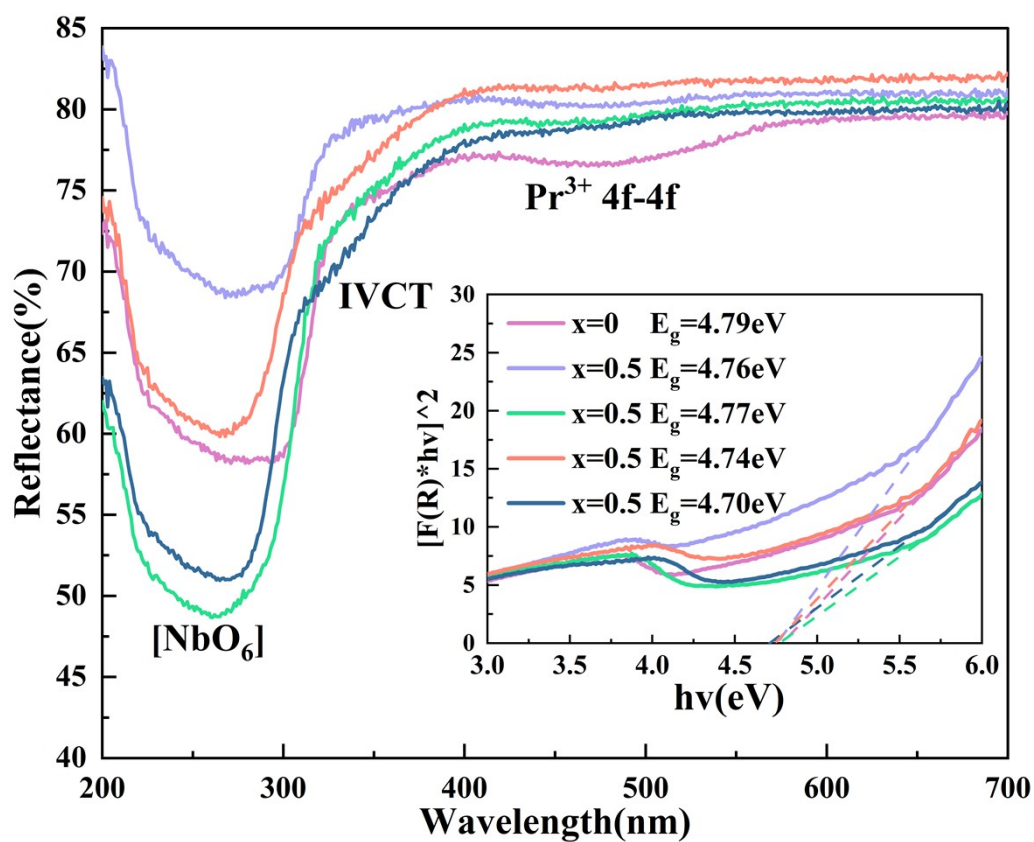

Figure S5. DR spectra of  $\text{Sr}_{2-x}\text{Ca}_x\text{Nb}_2\text{O}_7:\text{Pr}^{3+}$  ( $x = 0, 0.5, 1.0, 1.5, 2.0$ ). The illustration in the lower right corner is the energy-gap value of  $\text{Sr}_{2-x}\text{Ca}_x\text{Nb}_2\text{O}_7:\text{Pr}^{3+}$  ( $x = 0, 0.5, 1.0, 1.5, 2.0$ ) calculated according to the Kubelka–Munk absorption function.

# Figure S6

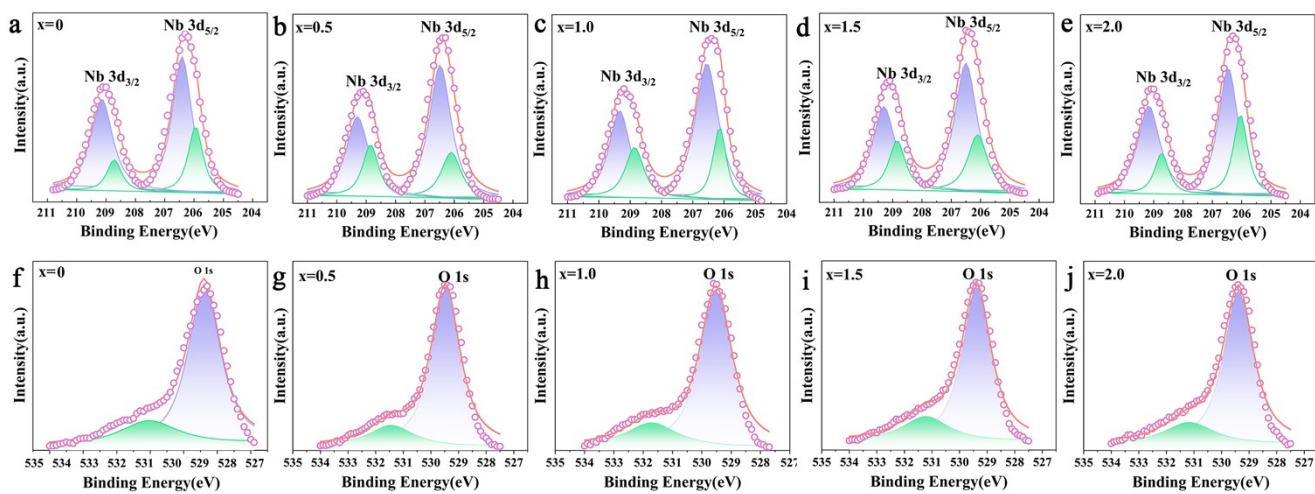

Figure S6. XPS spectra of Nb 3d (a-e) and O 1s (f-j) of  $\text{Sr}_{2-x}\text{Ca}_x\text{Nb}_2\text{O}_7:\text{Pr}^{3+}$  ( $x = 0, 0.5, 1.0, 1.5, 2.0$ ).



# Figure S7

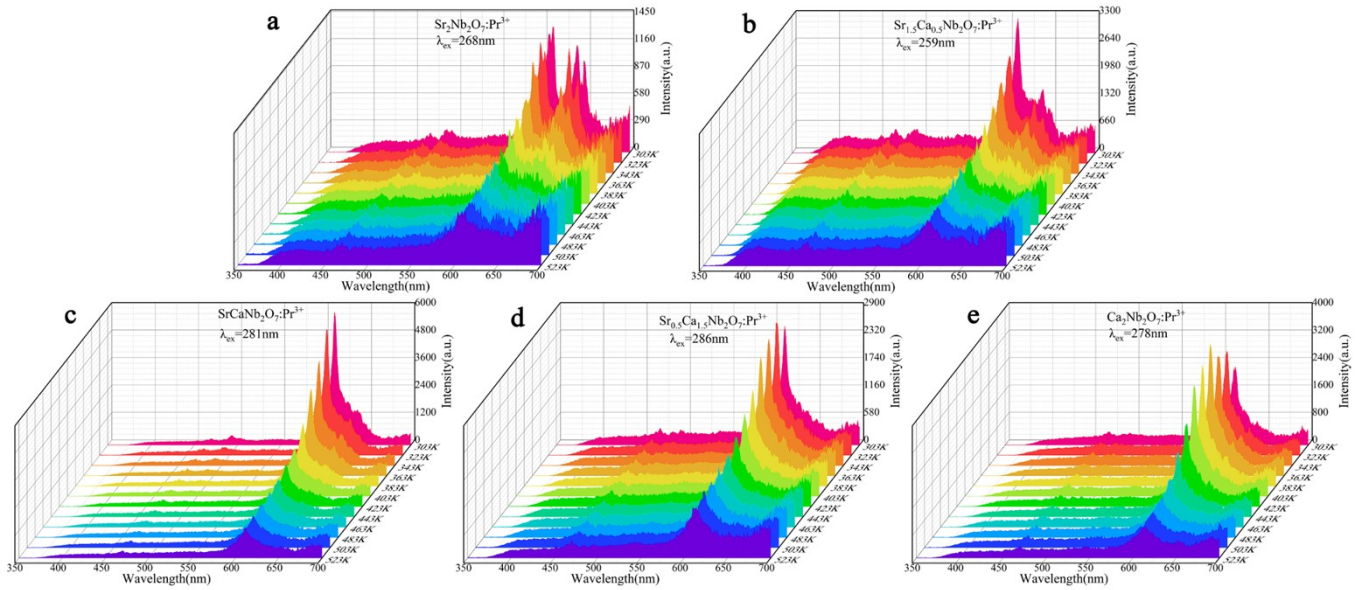

Figure S7. Temperature-dependent PL spectra of  $\text{Sr}_{2-x}\text{Ca}_x\text{Nb}_2\text{O}_7:\text{Pr}^{3+}$  ( $x = 0, 0.5, 1.0, 1.5, 2.0$ ) under excitation at CTB.

# Figure S8

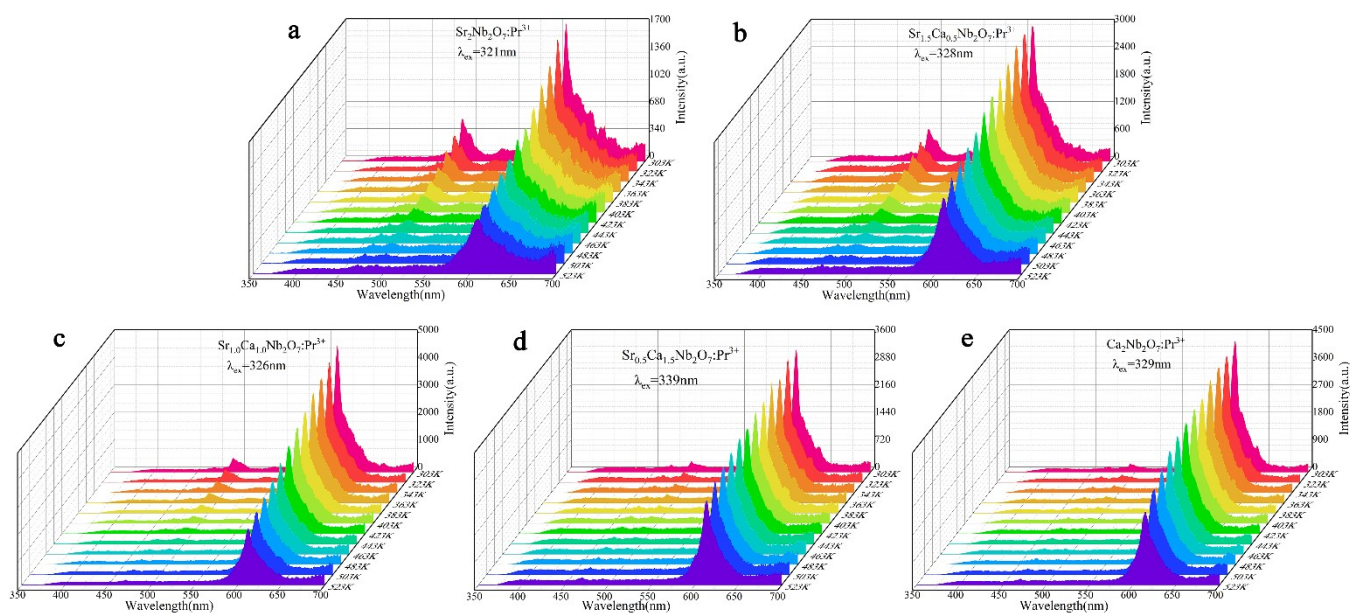

Figure S8. Temperature-dependent PL spectra of  $\text{Sr}_{2-x}\text{Ca}_x\text{Nb}_2\text{O}_7:\text{Pr}^{3+}$  ( $x = 0, 0.5, 1.0, 1.5, 2.0$ ) under excitation at IVCT band.

# Figure S9

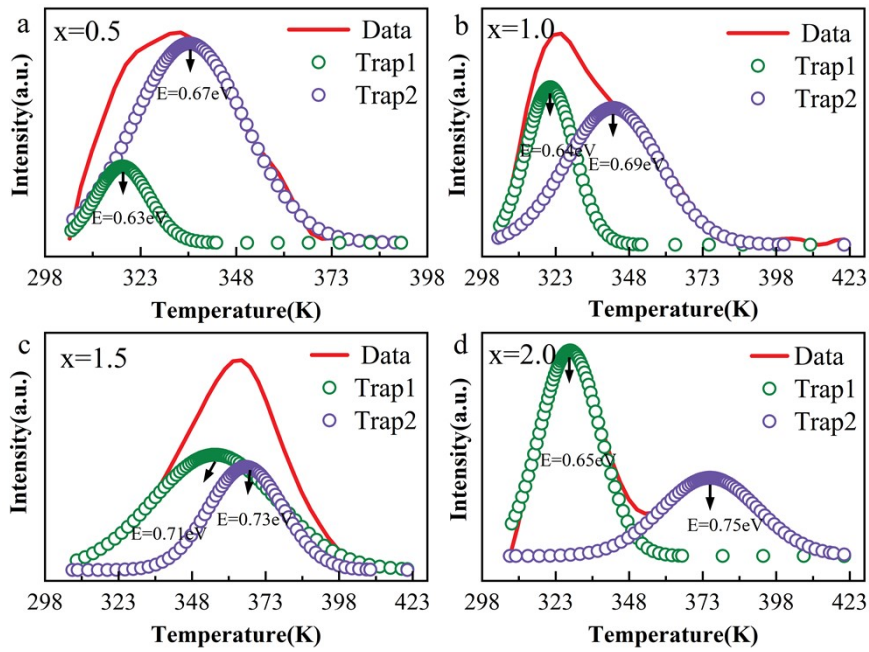

Figure S9. The Gaussian fit of TL curve of  $\text{Sr}_{2-x}\text{Ca}_x\text{Nb}_2\text{O}_7:\text{Pr}^{3+}$  ( $x = 0.5, 1.0, 1.5, 2.0$ ).

# Figure S10

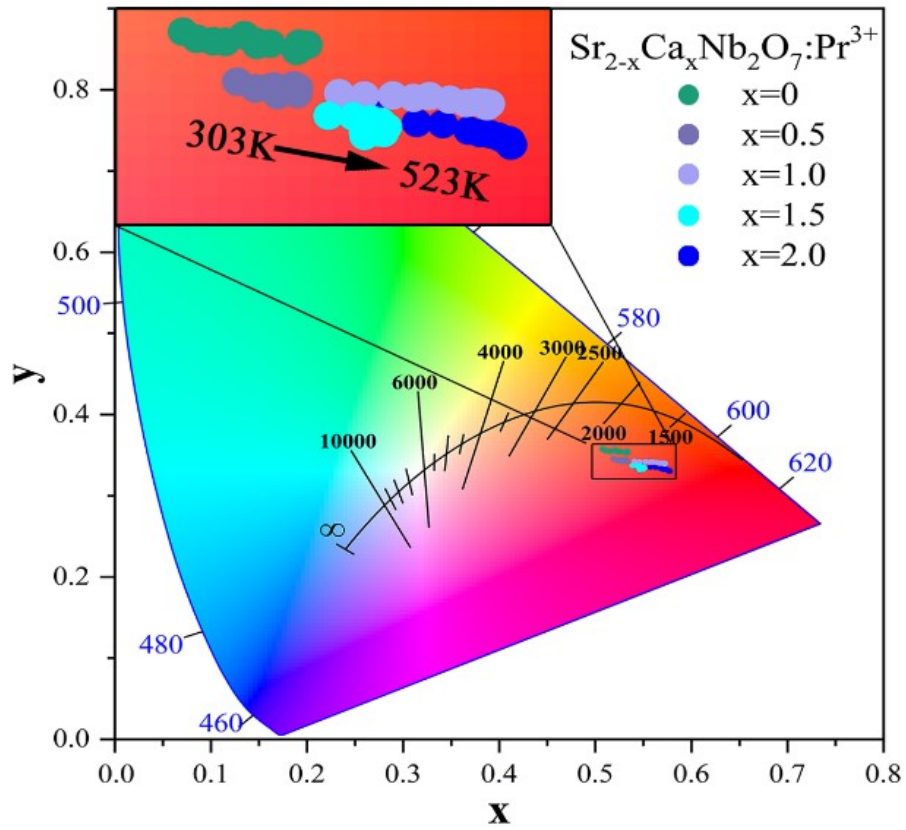

Figure S10. The CIE chromaticity diagram and CIE coordinate shift of  $\text{Sr}_{2-x}\text{Ca}_x\text{Nb}_2\text{O}_7:\text{Pr}^{3+}$  ( $x = 0, 0.5, 1.0, 1.5, 2.0$ ) at different temperatures under IVCT band excitation.

## Table S1

Table S1. Refinement results of the atomic coordinates of  $\text{Sr}_{2-x}\text{Ca}_x\text{Nb}_2\text{O}_7:\text{Pr}^{3+}$  ( $x = 0, 0.5, 1.0, 1.5, 2.0$ ).

| parameter         | space group | a(Å)       | b(Å)        | c(Å)        | $\alpha = \beta = \gamma(^{\circ})$ | V(Å <sup>3</sup> ) |
|-------------------|-------------|------------|-------------|-------------|-------------------------------------|--------------------|
| Sr <sub>2.0</sub> | Pna21       | 26.7768(3) | 7.90949(8)  | 5.70105(7)  | 90                                  | 1207.428(17)       |
| Sr <sub>1.5</sub> | Pna21       | 26.7081(5) | 7.85923(13) | 5.66048(12) | 90                                  | 1188.17(3)         |
| Sr <sub>1.0</sub> | Pna21       | 26.5977(8) | 7.80319(19) | 5.61555(17) | 90                                  | 1165.49(4)         |
| Sr <sub>0.5</sub> | Pna21       | 26.5096(5) | 7.74092(13) | 5.55500(12) | 90                                  | 1139.936(26)       |
| Sr <sub>0</sub>   | Pna21       | 26.4426(4) | 7.68791(9)  | 5.49584(8)  | 90                                  | 1117.242(18)       |

## Table S2

**Table S2.** IVCT Energy Level Positions Calculated According to Theoretical Empirical Formulas.

| Sample                                        | Sr <sub>2.0</sub>                                                                                                                    | Sr <sub>1.5</sub> | Sr <sub>1.0</sub> | Sr <sub>0.5</sub> | Sr <sub>0</sub> |
|-----------------------------------------------|--------------------------------------------------------------------------------------------------------------------------------------|-------------------|-------------------|-------------------|-----------------|
| $d_{\min}(\text{Pr}^{3+}\text{-Nb}^{5+})$ (Å) | 3.4107                                                                                                                               | 3.2548            | 3.3797            | 3.2155            | 3.2922          |
| Wavenumber (cm <sup>-1</sup> )                | 31788.27                                                                                                                             | 30494.11          | 31540.10          | 30148.51          | 30815.33        |
| Wavelength (nm)                               | 315                                                                                                                                  | 328               | 317               | 332               | 325             |
| Theoretical equation                          | $IVCT(\text{cm}^{-1}) = 58800 - 49800 \left[ \frac{\chi_{opt}(\text{Nb}^{5+})^*}{d_{\min}(\text{Pr}^{3+} - \text{Nb}^{5+})} \right]$ |                   |                   |                   |                 |

\* $\chi_{opt}$  is the Nb<sup>5+</sup>optical electronegativity (Nb<sup>5+</sup> = 1.85).<sup>3</sup>

## References

1. C. Yang, et al., *Inorg. Chem. Front.*, 2023, **10**, 4808-4818.
2. X. Lv, et al., *J. Lumin.*, 2023, **255**, 119609.
3. P. Boutinaud, et al., *J. Phys.: Condens. Matter*, 2007, **19**, 386230.
